# Supplementary material
Source: PubMed Central journal article supplement (PMC8261688)
Supplement: jamaneurol-e212043-s001.pdf [file jamaneurol-e212043-s001.pdf]

## Supplemental Online Content

McCrea MA, Giacino JT, Barber J, et al; the TRACK-TBI Investigators. Functional outcomes over the first year after moderate to severe traumatic brain injury in the prospective, longitudinal TRACK-TBI study. *JAMA Neurol*. Published July 6, 2021. doi:10.1001/jamaneurol.2021.2043

**eTable 1.** TRACK-TBI INCLUSION/EXCLUSION CRITERIA

**eTable 2.** Results of mixed model analysis on Glasgow Outcome Scale Extended (GOSE) score

**eTable 3.** Glasgow Outcome Scale Extended (GOSE) frequencies at 3, 6, and 12 months for Severe TBI and Moderate TBI participants in vegetative state at 2 weeks post-injury

**eTable 4.** Disability Rating Scale (DRS) frequencies at 3, 6, and 12 months for Severe TBI and Moderate TBI participants in vegetative state at 2 weeks post-injury

**eTable 5.** Cumulative frequencies and risk ratios within each Glasgow Outcome Scale Extended (GOSE) Domain for Severe TBI and Moderate TBI groups at 2 weeks, 3, 6, and 12 months post-injury

**eTable 6.** Frequencies within each Disability Rating Scale (DRS) domain for Severe TBI and Moderate TBI groups at 2 weeks and 3, 6, and 12 months post-injury

**eTable 7.** Cumulative frequencies and risk ratios within each Disability Rating Scale (DRS) domain for Severe TBI and Moderate TBI groups at 2 weeks, 3 months, 6 months and 12 months post-injury

**eTable 8.** Group differences on clinical outcome assessment measures at 12 months post-injury

**eFigure.** STROBE diagram of participant enrollment and follow-up for Moderate TBI (GCS 9-12) and Severe TBI (GCS 3-8) groups

This supplemental material has been provided by the authors to give readers additional information about their work.

**eTable 1. TRACK-TBI INCLUSION/EXCLUSION CRITERIA**

| <b>Criterion</b>                                                                                                                                                                                                                                                                         | <b>Data Source</b> | <b>Comments</b>                                                                                                                                      |
|------------------------------------------------------------------------------------------------------------------------------------------------------------------------------------------------------------------------------------------------------------------------------------------|--------------------|------------------------------------------------------------------------------------------------------------------------------------------------------|
| <b>Inclusion Criteria</b>                                                                                                                                                                                                                                                                |                    |                                                                                                                                                      |
| 1. Age 0-100                                                                                                                                                                                                                                                                             | Chart              |                                                                                                                                                      |
| 2. Documented/verified TBI (ACRM Criteria)                                                                                                                                                                                                                                               | Chart, Interview   |                                                                                                                                                      |
| 3. Injury occurred < 24 hours ago                                                                                                                                                                                                                                                        | Chart, Interview   |                                                                                                                                                      |
| 4. Acute brain CT for clinical care                                                                                                                                                                                                                                                      | Chart              | Subject must have brain CT scan                                                                                                                      |
| 5. Visual acuity/hearing adequate for testing                                                                                                                                                                                                                                            | Chart, Interview   |                                                                                                                                                      |
| 6. Fluency in English or Spanish                                                                                                                                                                                                                                                         | Chart, Interview   | Based on Test battery or personnel availability                                                                                                      |
| 7. Ability to provide informed consent                                                                                                                                                                                                                                                   | Interview          | <input type="checkbox"/> Patient <input type="checkbox"/> Surrogate <input type="checkbox"/> Waiver                                                  |
| <b>Exclusion Criteria</b>                                                                                                                                                                                                                                                                |                    |                                                                                                                                                      |
| 1. Significant polytrauma that would interfere with follow-up and outcome assessment                                                                                                                                                                                                     | Chart              | Significant body trauma may confound TBI outcomes testing.                                                                                           |
| 2. Prisoners or patients in custody                                                                                                                                                                                                                                                      | Chart, Interview   |                                                                                                                                                      |
| 3. Pregnancy in female subjects                                                                                                                                                                                                                                                          | Chart, Interview   |                                                                                                                                                      |
| 4. Patients on psychiatric hold (eg 5150, 5250)                                                                                                                                                                                                                                          | Chart              |                                                                                                                                                      |
| 5. Major debilitating baseline mental health disorders (eg schizophrenia or bipolar disorder) that would interfere with follow-up and the validity of outcome assessment                                                                                                                 | Chart, Interview   | Debilitating psychiatric disorders can significantly impact the reliability of follow up and/or pose difficulties in attributing to index TBI.       |
| 6. Major debilitating neurological disease (eg stroke, CVA, dementia, tumor) impairing baseline awareness, cognition, or validity of follow-up and outcome assessment                                                                                                                    | Chart, Interview   | Documented debilitating baseline cognitive impairment will confound outcome assessment in addition to not being fully consent able.                  |
| 7. Significant history of pre-existing conditions that would interfere with follow-up and outcome assessment (eg substance abuse, alcoholism, HIV/AIDS, major transmittable diseases that may interfere with consent, end-stage cancers, learning disabilities, developmental disorders) | Chart, Interview   |                                                                                                                                                      |
| 8. Contraindications to MRI (for CA+MR/CA+MRI-HDFT cohort)                                                                                                                                                                                                                               | MRI Screening      |                                                                                                                                                      |
| 9. Low likelihood of follow-up (eg participant or family indicating low interest, residence in another state or country, homelessness or lack of reliable contacts)                                                                                                                      | Interview          |                                                                                                                                                      |
| 10. Current participant in an interventional trial (eg drug, device, behavioral)                                                                                                                                                                                                         | Chart, Interview   | Exception to co-enrollment exclusion is made for sites participating in Resuscitation Outcomes Consortium Prehospital Tranexamic Acid for TBI Study. |
| 11. Penetrating TBI                                                                                                                                                                                                                                                                      | Chart              |                                                                                                                                                      |
| 12. Spinal cord injury with ASIA score of C or worse                                                                                                                                                                                                                                     | Chart              |                                                                                                                                                      |

**eTable 2. Results of mixed model analysis on Glasgow Outcome Scale Extended (GOSE) score.**

| Effect <sup>1</sup>    | Linear Analysis |              |       | Ranked Analysis |              |       |
|------------------------|-----------------|--------------|-------|-----------------|--------------|-------|
|                        | B <sup>2</sup>  | 95% CI       | p     | B <sup>3</sup>  | 95% CI       | p     |
| <b>GOSE Change</b>     |                 |              | <.001 |                 |              | <.001 |
| 3mo - 2wk              | 0.96            | (0.82, 1.11) | <.001 | 11.5            | (10.0, 13.0) | <.001 |
| 6mo - 2wk              | 1.35            | (1.21, 1.50) | <.001 | 15.4            | (13.9, 17.0) | <.001 |
| 12mo - 2wk             | 1.55            | (1.41, 1.70) | <.001 | 17.0            | (15.5, 18.6) | <.001 |
| 6mo - 3mo              | 0.39            | (0.25, 0.53) | <.001 | 3.9             | (2.4, 5.5)   | <.001 |
| 12mo - 3mo             | 0.59            | (0.44, 0.73) | <.001 | 5.5             | (4.0, 7.1)   | <.001 |
| 12mo - 6mo             | 0.20            | (0.05, 0.34) | .007  | 1.6             | (0.0, 3.2)   | .043  |
| <b>Moderate-Severe</b> | 1.11            | (0.70, 1.53) | <.001 | 13.2            | (8.2, 18.1)  | <.001 |

To formally examine change over time on the GOSE, we fit linear mixed models on the score, clustering on participant and site and considering time as categorical. No group by time interactions were found (all  $p > .15$ ) so only results from the main effect model are presented. We also fit the models based on ranked GOSE scores for the entire sample, given that the GOSE is not an interval measure.

Mixed-effects regression clustering on subject and site (LRT  $p < .001$ )

1 Main-effects model only; an interaction model was also fit, but none of the interactions were statistically significant ( $p > .15$ )

2 B represents the difference in mean GOSE (1-8) from linear regression

3 B represents the difference in mean GOSE percentile (0-100) from rank regression

**eTable 3. Glasgow Outcome Scale Extended (GOSE) frequencies at 3, 6, and 12 months for Severe TBI and Moderate TBI participants in vegetative state at 2 weeks post-injury**

|                                     | 2 Weeks          |                    | 3 Months         |                   | 6 Months         |                    | 12 Months        |                    |
|-------------------------------------|------------------|--------------------|------------------|-------------------|------------------|--------------------|------------------|--------------------|
|                                     | Severe<br>(n=68) | Moderate<br>(n=11) | Severe<br>(n=60) | Moderate<br>(n=9) | Severe<br>(n=57) | Moderate<br>(n=11) | Severe<br>(n=56) | Moderate<br>(n=10) |
| <b>Vegetative State &amp; Death</b> |                  |                    |                  |                   |                  |                    |                  |                    |
| Vegetative state                    | 68 (100%)        | 11 (100%)          | 9 (15%)          | 0 (0%)            | 3 (5%)           | 0 (0%)             | 0 (0%)           | 0 (0%)             |
| Died                                |                  |                    | 9 (15%)          | 3 (33%)           | 11 (19%)         | 3 (27%)            | 14 (25%)         | 3 (30%)            |
| <b>Independence in the home</b>     |                  |                    |                  |                   |                  |                    |                  |                    |
| No assistance                       |                  |                    | 11 (18%)         | 1 (11%)           | 13 (23%)         | 2 (18%)            | 17 (30%)         | 3 (30%)            |
| Infrequent assistance               |                  |                    | 0 (0%)           | 0 (0%)            | 3 (5%)           | 0 (0%)             | 1 (2%)           | 0 (0%)             |
| Frequent assistance                 |                  |                    | 31 (52%)         | 5 (56%)           | 27 (47%)         | 6 (55%)            | 24 (43%)         | 4 (40%)            |
| <b>Independence in shopping</b>     |                  |                    |                  |                   |                  |                    |                  |                    |
| No assistance                       |                  |                    | 8 (13%)          | 1 (11%)           | 14 (25%)         | 2 (18%)            | 18 (32%)         | 3 (30%)            |
| Assistance                          |                  |                    | 34 (57%)         | 5 (56%)           | 29 (51%)         | 6 (55%)            | 24 (43%)         | 4 (40%)            |
| <b>Independence in travelling</b>   |                  |                    |                  |                   |                  |                    |                  |                    |
| No assistance                       |                  |                    | 9 (15%)          | 1 (11%)           | 13 (23%)         | 2 (18%)            | 15 (27%)         | 3 (30%)            |
| Assistance                          |                  |                    | 33 (55%)         | 5 (56%)           | 30 (53%)         | 6 (55%)            | 27 (48%)         | 4 (40%)            |
| <b>Work</b>                         |                  |                    |                  |                   |                  |                    |                  |                    |
| No deficit                          |                  |                    | 1 (2%)           | 0 (0%)            | 3 (6%)           | 2 (18%)            | 4 (8%)           | 2 (20%)            |
| Reduced capacity                    |                  |                    | 3 (5%)           | 1 (11%)           | 4 (8%)           | 0 (0%)             | 4 (8%)           | 0 (0%)             |
| Limited/unable to work              |                  |                    | 38 (69%)         | 5 (56%)           | 34 (67%)         | 6 (55%)            | 32 (64%)         | 5 (50%)            |
| <b>Social/leisure functioning</b>   |                  |                    |                  |                   |                  |                    |                  |                    |
| No deficit                          |                  |                    | 3 (5%)           | 0 (0%)            | 8 (14%)          | 2 (18%)            | 8 (14%)          | 2 (20%)            |
| A bit less                          |                  |                    | 1 (2%)           | 0 (0%)            | 5 (9%)           | 0 (0%)             | 2 (4%)           | 0 (0%)             |
| Much less                           |                  |                    | 9 (15%)          | 1 (11%)           | 6 (11%)          | 0 (0%)             | 10 (18%)         | 1 (10%)            |
| Unable                              |                  |                    | 29 (48%)         | 5 (56%)           | 24 (42%)         | 6 (55%)            | 22 (39%)         | 4 (40%)            |

|                                                  | 2 Weeks          |                    | 3 Months         |                   | 6 Months         |                    | 12 Months        |                    |
|--------------------------------------------------|------------------|--------------------|------------------|-------------------|------------------|--------------------|------------------|--------------------|
|                                                  | Severe<br>(n=68) | Moderate<br>(n=11) | Severe<br>(n=60) | Moderate<br>(n=9) | Severe<br>(n=57) | Moderate<br>(n=11) | Severe<br>(n=56) | Moderate<br>(n=10) |
| <b>Psychological/<br/>interpersonal problems</b> |                  |                    |                  |                   |                  |                    |                  |                    |
| No disruption                                    |                  |                    | 30 (50%)         | 3 (33%)           | 23 (40%)         | 4 (36%)            | 24 (43%)         | 3 (30%)            |
| Occasional                                       |                  |                    | 3 (5%)           | 0 (0%)            | 5 (9%)           | 0 (0%)             | 2 (4%)           | 1 (10%)            |
| Frequent                                         |                  |                    | 4 (7%)           | 1 (11%)           | 6 (11%)          | 0 (0%)             | 7 (13%)          | 1 (10%)            |
| Constant                                         |                  |                    | 5 (8%)           | 2 (22%)           | 9 (16%)          | 4 (36%)            | 9 (16%)          | 2 (20%)            |
| <b>Other disabling<br/>symptoms</b>              |                  |                    |                  |                   |                  |                    |                  |                    |
| No impact                                        |                  |                    | 6 (10%)          | 2 (22%)           | 12 (21%)         | 3 (27%)            | 10 (18%)         | 1 (10%)            |
| Some impact                                      |                  |                    | 36 (60%)         | 4 (44%)           | 31 (54%)         | 5 (45%)            | 32 (57%)         | 6 (60%)            |

Percentages within each domain sum to 100% after adding percent in Vegetative State and Died categories for the group at that time point(column), with the exception of the 'work' domain which excludes pre-injury non-workers.

**eTable 4. Disability Rating Scale (DRS) frequencies at 3, 6, and 12 months for Severe TBI and Moderate TBI participants in vegetative state at 2 weeks post-injury.**

|                                     | 2 Weeks          |                    | 3 Months         |                    | 6 Months         |                    | 12 Months        |                    |
|-------------------------------------|------------------|--------------------|------------------|--------------------|------------------|--------------------|------------------|--------------------|
|                                     | Severe<br>(n=68) | Moderate<br>(n=11) | Severe<br>(n=58) | Moderate<br>(n=10) | Severe<br>(n=55) | Moderate<br>(n=11) | Severe<br>(n=56) | Moderate<br>(n=10) |
| <b>Vegetative State &amp; Death</b> |                  |                    |                  |                    |                  |                    |                  |                    |
| Vegetative state                    | 68 (100%)        | 11 (100%)          | 9 (16%)          | 0 (0%)             | 3 (5%)           | 0 (0%)             | 0 (0%)           | 0 (0%)             |
| Died                                |                  |                    | 9 (16%)          | 3 (30%)            | 11 (20%)         | 3 (27%)            | 14 (25%)         | 3 (30%)            |
| <b>DRS #2 Communication</b>         |                  |                    |                  |                    |                  |                    |                  |                    |
| Oriented                            |                  |                    | 11 (19%)         | 2 (20%)            | 11 (20%)         | 2 (18%)            | 14 (25%)         | 3 (30%)            |
| Confused                            |                  |                    | 23 (40%)         | 5 (50%)            | 27 (49%)         | 6 (55%)            | 23 (41%)         | 3 (30%)            |
| Inappropriate                       |                  |                    | 6 (10%)          | 0 (0%)             | 3 (5%)           | 0 (0%)             | 5 (9%)           | 1 (10%)            |
| <b>DRS #4 Feeding</b>               |                  |                    |                  |                    |                  |                    |                  |                    |
| Complete                            |                  |                    | 24 (41%)         | 3 (30%)            | 26 (47%)         | 4 (36%)            | 27 (49%)         | 5 (50%)            |
| Partial                             |                  |                    | 4 (7%)           | 1 (10%)            | 3 (5%)           | 3 (27%)            | 2 (4%)           | 1 (10%)            |
| Minimal                             |                  |                    | 5 (9%)           | 1 (10%)            | 5 (9%)           | 1 (9%)             | 5 (9%)           | 1 (10%)            |
| None                                |                  |                    | 7 (12%)          | 2 (20%)            | 7 (13%)          | 0 (0%)             | 7 (13%)          | 0 (0%)             |
| <b>DRS #5 Toileting</b>             |                  |                    |                  |                    |                  |                    |                  |                    |
| Complete                            |                  |                    | 18 (31%)         | 3 (30%)            | 25 (45%)         | 5 (45%)            | 25 (45%)         | 5 (50%)            |
| Partial                             |                  |                    | 5 (9%)           | 1 (10%)            | 2 (4%)           | 1 (9%)             | 2 (4%)           | 1 (10%)            |
| Minimal                             |                  |                    | 5 (9%)           | 1 (10%)            | 3 (5%)           | 0 (0%)             | 3 (5%)           | 1 (10%)            |
| None                                |                  |                    | 12 (21%)         | 2 (20%)            | 11 (20%)         | 2 (18%)            | 11 (20%)         | 0 (0%)             |
| <b>DRS #6 Grooming</b>              |                  |                    |                  |                    |                  |                    |                  |                    |
| Complete                            |                  |                    | 18 (31%)         | 3 (30%)            | 22 (40%)         | 3 (27%)            | 23 (42%)         | 5 (50%)            |
| Partial                             |                  |                    | 3 (5%)           | 1 (10%)            | 3 (5%)           | 3 (27%)            | 4 (7%)           | 0 (0%)             |
| Minimal                             |                  |                    | 9 (16%)          | 1 (10%)            | 7 (13%)          | 1 (9%)             | 5 (9%)           | 2 (20%)            |
| None                                |                  |                    | 10 (17%)         | 2 (20%)            | 9 (16%)          | 1 (9%)             | 9 (16%)          | 0 (0%)             |
| <b>DRS #7 Level of Functioning</b>  |                  |                    |                  |                    |                  |                    |                  |                    |
| Completely independent              |                  |                    | 4 (7%)           | 0 (0%)             | 6 (11%)          | 2 (18%)            | 7 (13%)          | 2 (20%)            |

|                                    | 2 Weeks          |                    | 3 Months         |                    | 6 Months         |                    | 12 Months        |                    |
|------------------------------------|------------------|--------------------|------------------|--------------------|------------------|--------------------|------------------|--------------------|
|                                    | Severe<br>(n=68) | Moderate<br>(n=11) | Severe<br>(n=58) | Moderate<br>(n=10) | Severe<br>(n=55) | Moderate<br>(n=11) | Severe<br>(n=56) | Moderate<br>(n=10) |
| Independent in special environment |                  |                    | 1 (2%)           | 0 (0%)             | 0 (0%)           | 0 (0%)             | 2 (4%)           | 0 (0%)             |
| Mildly dependent                   |                  |                    | 10 (17%)         | 2 (20%)            | 8 (15%)          | 0 (0%)             | 8 (15%)          | 2 (20%)            |
| Moderately dependent               |                  |                    | 3 (5%)           | 0 (0%)             | 6 (11%)          | 2 (18%)            | 4 (7%)           | 1 (10%)            |
| Markedly dependent                 |                  |                    | 1 (2%)           | 0 (0%)             | 2 (4%)           | 1 (9%)             | 6 (11%)          | 1 (10%)            |
| Totally dependent                  |                  |                    | 21 (36%)         | 5 (50%)            | 19 (35%)         | 3 (27%)            | 14 (25%)         | 1 (10%)            |
| <b>DRS #8 Employability</b>        |                  |                    |                  |                    |                  |                    |                  |                    |
| Not restricted                     |                  |                    | 4 (7%)           | 2 (20%)            | 8 (15%)          | 2 (18%)            | 10 (18%)         | 2 (20%)            |
| Selected jobs                      |                  |                    | 7 (12%)          | 1 (10%)            | 11 (20%)         | 1 (9%)             | 6 (11%)          | 2 (20%)            |
| Sheltered workshop                 |                  |                    | 8 (14%)          | 0 (0%)             | 5 (9%)           | 3 (27%)            | 8 (15%)          | 1 (10%)            |
| Unemployable                       |                  |                    | 20 (34%)         | 4 (40%)            | 17 (31%)         | 2 (18%)            | 17 (31%)         | 2 (20%)            |

Percentages within each domain sum to 100% after adding percent in Vegetative State and Died categories for the group at that time point (column).

**eTable 5. Cumulative frequencies and risk ratios within each Glasgow Outcome Scale Extended (GOSE) Domain for Severe TBI and Moderate TBI groups at 2 weeks, 3, 6, and 12 months post-injury**

| GOSE Domain Severity                   | 2 Weeks                  |                      |                                              | 3 Months                 |                      |                                              | 6 Months                 |                      |                                              | 12 Months                |                      |                                              |
|----------------------------------------|--------------------------|----------------------|----------------------------------------------|--------------------------|----------------------|----------------------------------------------|--------------------------|----------------------|----------------------------------------------|--------------------------|----------------------|----------------------------------------------|
|                                        | Severe<br>(n=290)        | Moderate<br>(n=93)   | Risk<br>Ratio                                | Severe<br>(n=274)        | Moderate<br>(n=84)   | Risk<br>Ratio                                | Severe<br>(n=282)        | Moderate<br>(n=75)   | Risk<br>Ratio                                | Severe<br>(n=271)        | Moderate<br>(n=72)   | Risk<br>Ratio                                |
| <b>Vegetative State and Death</b>      |                          |                      |                                              |                          |                      |                                              |                          |                      |                                              |                          |                      |                                              |
| Vegetative state or died               | 128<br>(44%)<br>[38, 50] | 15 (16%)<br>[10, 24] | <b>2.74</b><br><b>(1.69,</b><br><b>4.43)</b> | 83<br>(30%)<br>[25, 35]  | 9 (11%)<br>[5, 18]   | <b>2.79</b><br><b>(1.46,</b><br><b>5.30)</b> | 82 (29%)<br>[24, 35]     | 9 (12%)<br>[6, 21]   | <b>2.42</b><br><b>(1.28,</b><br><b>4.59)</b> | 84<br>(31%)<br>[26, 37]  | 9 (13%)<br>[6, 21]   | <b>2.48</b><br><b>(1.31,</b><br><b>4.69)</b> |
| Died                                   | 60 (21%)<br>[16, 26]     | 4 (4%)<br>[1, 10]    | <b>4.81</b><br><b>(1.80,</b><br><b>12.9)</b> | 73<br>(26%)<br>[21, 32]  | 9 (11%)<br>[5, 18]   | <b>2.45</b><br><b>(1.28,</b><br><b>4.69)</b> | 78 (28%)<br>[23, 33]     | 9 (12%)<br>[6, 21]   | <b>2.30</b><br><b>(1.21,</b><br><b>4.38)</b> | 83<br>(31%)<br>[25, 36]  | 9 (13%)<br>[6, 21]   | <b>2.45</b><br><b>(1.30,</b><br><b>4.63)</b> |
| <b>Independence in the home</b>        |                          |                      |                                              |                          |                      |                                              |                          |                      |                                              |                          |                      |                                              |
| Infrequent assistance<br>(or worse)    | 259<br>(89%)<br>[85, 93] | 57 (61%)<br>[51, 71] | <b>1.46</b><br><b>(1.23,</b><br><b>1.72)</b> | 163<br>(59%)<br>[53, 64] | 29 (35%)<br>[25, 45] | <b>1.70</b><br><b>(1.24,</b><br><b>2.32)</b> | 143<br>(51%)<br>[45, 57] | 24 (32%)<br>[22, 43] | <b>1.58</b><br><b>(1.12,</b><br><b>2.25)</b> | 134<br>(49%)<br>[44, 55] | 22 (31%)<br>[21, 42] | <b>1.62</b><br><b>(1.12,</b><br><b>2.34)</b> |
| Frequent assistance (or<br>worse)      | 254<br>(88%)<br>[83, 91] | 55 (59%)<br>[49, 69] | <b>1.48</b><br><b>(1.24,</b><br><b>1.76)</b> | 154<br>(55%)<br>[50, 61] | 26 (31%)<br>[22, 41] | <b>1.79</b><br><b>(1.28,</b><br><b>2.51)</b> | 137<br>(49%)<br>[43, 54] | 22 (29%)<br>[20, 40] | <b>1.66</b><br><b>(1.14,</b><br><b>2.40)</b> | 129<br>(48%)<br>[42, 54] | 18 (25%)<br>[16, 36] | <b>1.90</b><br><b>(1.25,</b><br><b>2.90)</b> |
| <b>Independence in shopping</b>        |                          |                      |                                              |                          |                      |                                              |                          |                      |                                              |                          |                      |                                              |
| Assistance<br>(or worse)               | 256<br>(89%)<br>[85, 92] | 57 (61%)<br>[51, 71] | <b>1.45</b><br><b>(1.22,</b><br><b>1.71)</b> | 163<br>(59%)<br>[53, 64] | 30 (36%)<br>[26, 46] | <b>1.64</b><br><b>(1.21,</b><br><b>2.22)</b> | 142<br>(50%)<br>[45, 56] | 27 (36%)<br>[26, 47] | <b>1.40</b><br><b>(1.01,</b><br><b>1.93)</b> | 136<br>(50%)<br>[44, 56] | 25 (35%)<br>[24, 46] | <b>1.45</b><br><b>(1.03,</b><br><b>2.03)</b> |
| <b>Independence in travelling</b>      |                          |                      |                                              |                          |                      |                                              |                          |                      |                                              |                          |                      |                                              |
| Assistance<br>(or worse)               | 256<br>(89%)<br>[85, 92] | 59 (63%)<br>[53, 73] | <b>1.40</b><br><b>(1.19,</b><br><b>1.64)</b> | 168<br>(60%)<br>[55, 66] | 30 (36%)<br>[26, 46] | <b>1.69</b><br><b>(1.25,</b><br><b>2.29)</b> | 143<br>(51%)<br>[45, 57] | 28 (37%)<br>[27, 49] | 1.36<br>(0.99,<br>1.86)                      | 138<br>(51%)<br>[45, 57] | 26 (36%)<br>[26, 48] | <b>1.41</b><br><b>(1.02,</b><br><b>1.96)</b> |
| <b>Work (among pre-injury workers)</b> |                          |                      |                                              |                          |                      |                                              |                          |                      |                                              |                          |                      |                                              |
| Reduced capacity<br>(or worse)         | 208<br>(99%)             | 71 (90%)<br>[82, 95] | <b>1.10</b>                                  | 186<br>(88%)             | 51 (71%)<br>[60, 80] | <b>1.24</b>                                  | 155<br>(73%)             | 39 (63%)<br>[51, 74] | 1.16                                         | 136<br>(66%)             | 31 (51%)<br>[38, 63] | <b>1.30</b>                                  |



| GOSE Domain Severity                             | 2 Weeks                  |                      |                                  | 3 Months                 |                      |                                  | 6 Months                 |                      |                                  | 12 Months                |                      |                                  |
|--------------------------------------------------|--------------------------|----------------------|----------------------------------|--------------------------|----------------------|----------------------------------|--------------------------|----------------------|----------------------------------|--------------------------|----------------------|----------------------------------|
|                                                  | Severe<br>(n=290)        | Moderate<br>(n=93)   | Risk<br>Ratio                    | Severe<br>(n=274)        | Moderate<br>(n=84)   | Risk<br>Ratio                    | Severe<br>(n=282)        | Moderate<br>(n=75)   | Risk<br>Ratio                    | Severe<br>(n=271)        | Moderate<br>(n=72)   | Risk<br>Ratio                    |
|                                                  | [97, 100]                |                      | <b>(1.02,<br/>1.19)</b>          | [83, 92]                 |                      | <b>(1.06,<br/>1.45)</b>          | [67, 79]                 |                      | (0.94,<br>1.43)                  | [59, 72]                 |                      | <b>(1.00,<br/>1.69)</b>          |
| Limited/unable to work ( <i>or worse</i> )       | 205<br>(98%)<br>[95, 99] | 67 (85%)<br>[76, 92] | <b>1.15<br/>(1.05,<br/>1.27)</b> | 161<br>(76%)<br>[70, 82] | 39 (54%)<br>[43, 65] | <b>1.41<br/>(1.12,<br/>1.76)</b> | 129<br>(61%)<br>[54, 67] | 27 (44%)<br>[32, 56] | <b>1.40<br/>(1.03,<br/>1.89)</b> | 116<br>(56%)<br>[49, 63] | 24 (39%)<br>[28, 52] | <b>1.43<br/>(1.02,<br/>2.00)</b> |
| <b>Social/leisure functioning</b>                |                          |                      |                                  |                          |                      |                                  |                          |                      |                                  |                          |                      |                                  |
| A bit less<br>( <i>or worse</i> )                | 278<br>(96%)<br>[94, 98] | 76 (83%)<br>[74, 89] | <b>1.16<br/>(1.06,<br/>1.28)</b> | 222<br>(80%)<br>[75, 84] | 50 (60%)<br>[49, 70] | <b>1.34<br/>(1.11,<br/>1.62)</b> | 190<br>(67%)<br>[62, 73] | 41 (55%)<br>[43, 66] | 1.23<br>(0.99,<br>1.54)          | 173<br>(64%)<br>[58, 69] | 38 (53%)<br>[41, 64] | 1.21<br>(0.96,<br>1.53)          |
| Much less<br>( <i>or worse</i> )                 | 269<br>(93%)<br>[90, 96] | 69 (75%)<br>[66, 83] | <b>1.24<br/>(1.10,<br/>1.40)</b> | 199<br>(72%)<br>[66, 77] | 40 (48%)<br>[37, 58] | <b>1.50<br/>(1.19,<br/>1.90)</b> | 166<br>(59%)<br>[53, 65] | 35 (47%)<br>[36, 58] | 1.26<br>(0.97,<br>1.64)          | 145<br>(54%)<br>[48, 59] | 29 (40%)<br>[29, 52] | 1.33<br>(0.98,<br>1.80)          |
| Unable ( <i>or worse</i> )                       | 252<br>(87%)<br>[83, 91] | 58 (63%)<br>[53, 72] | <b>1.38<br/>(1.18,<br/>1.63)</b> | 148<br>(53%)<br>[47, 59] | 25 (30%)<br>[21, 40] | <b>1.79<br/>(1.26,<br/>2.53)</b> | 128<br>(45%)<br>[40, 51] | 20 (27%)<br>[18, 37] | <b>1.70<br/>(1.14,<br/>2.53)</b> | 118<br>(44%)<br>[38, 49] | 16 (22%)<br>[14, 33] | <b>1.96<br/>(1.25,<br/>3.08)</b> |
| <b>Psychological/<br/>interpersonal problems</b> |                          |                      |                                  |                          |                      |                                  |                          |                      |                                  |                          |                      |                                  |
| Occasional<br>( <i>or worse</i> )                | 188<br>(65%)<br>[59, 70] | 54 (59%)<br>[48, 68] | 1.11<br>(0.92,<br>1.34)          | 156<br>(56%)<br>[50, 62] | 37 (44%)<br>[34, 55] | 1.27<br>(0.98,<br>1.66)          | 168<br>(60%)<br>[54, 65] | 41 (55%)<br>[43, 66] | 1.09<br>(0.87,<br>1.37)          | 162<br>(60%)<br>[54, 66] | 37 (51%)<br>[40, 63] | 1.16<br>(0.91,<br>1.49)          |
| Frequent<br>( <i>or worse</i> )                  | 182<br>(63%)<br>[57, 68] | 50 (54%)<br>[44, 64] | 1.16<br>(0.94,<br>1.43)          | 140<br>(50%)<br>[44, 56] | 32 (38%)<br>[28, 49] | 1.32<br>(0.98,<br>1.78)          | 143<br>(51%)<br>[45, 57] | 35 (47%)<br>[36, 58] | 1.09<br>(0.83,<br>1.42)          | 149<br>(55%)<br>[49, 61] | 30 (42%)<br>[31, 53] | 1.32<br>(0.98,<br>1.77)          |
| Constant ( <i>or worse</i> )                     | 166<br>(57%)<br>[52, 63] | 36 (39%)<br>[30, 49] | <b>1.47<br/>(1.12,<br/>1.93)</b> | 103<br>(37%)<br>[32, 43] | 19 (23%)<br>[15, 32] | <b>1.64<br/>(1.07,<br/>2.50)</b> | 103<br>(37%)<br>[31, 42] | 17 (23%)<br>[14, 33] | <b>1.61<br/>(1.03,<br/>2.52)</b> | 106<br>(39%)<br>[33, 45] | 15 (21%)<br>[13, 31] | <b>1.88<br/>(1.17,<br/>3.02)</b> |
| <b>Other disabling<br/>symptoms</b>              |                          |                      |                                  |                          |                      |                                  |                          |                      |                                  |                          |                      |                                  |
| Some impact ( <i>or worse</i> )                  | 251<br>(87%)<br>[83, 90] | 81 (87%)<br>[79, 93] | 1.00<br>(0.91,<br>1.09)          | 229<br>(82%)<br>[78, 87] | 69 (83%)<br>[74, 90] | 0.99<br>(0.89,<br>1.11)          | 230<br>(82%)<br>[77, 86] | 60 (80%)<br>[70, 88] | 1.02<br>(0.90,<br>1.16)          | 218<br>(80%)<br>[75, 85] | 54 (75%)<br>[64, 84] | 1.07<br>(0.93,<br>1.24)          |

"Severe" and "Moderate" columns report the n and percent of cases with a severity at or worse than the category label. Risk ratios were calculated as the percent with disability of the indicated level or worse in the Severe TBI group divided by the corresponding percent in the Moderate TBI group. For example, for reduced work capacity, the percentage includes those with reduced work capacity, limited/unable to work, vegetative state, or dead. The 95% confidence intervals on risk ratios were estimated based on the near-normal distribution of the log of the risk ratio.<sup>36</sup> Statistical significance determined by Fisher's exact tests. Bold cells indicate statistical significance ( $p < .05$ ) following post-hoc adjustment for all 108 multiple comparisons using a false discovery rate of 5%.<sup>3</sup>

**eTable 6. Frequencies within each Disability Rating Scale (DRS) domain for Severe TBI and Moderate TBI groups at 2 weeks and 3, 6, and 12 months post-injury**

| DRS Domain Severity<br>Unweighted Analyses | 2 Weeks           |                     | 3 Months          |                    | 6 Months          |                    | 12 Months         |                    |
|--------------------------------------------|-------------------|---------------------|-------------------|--------------------|-------------------|--------------------|-------------------|--------------------|
|                                            | Severe<br>(n=326) | Moderate<br>(n=106) | Severe<br>(n=297) | Moderate<br>(n=93) | Severe<br>(n=290) | Moderate<br>(n=77) | Severe<br>(n=273) | Moderate<br>(n=72) |
| <b>Vegetative State &amp; Death</b>        |                   |                     |                   |                    |                   |                    |                   |                    |
| Veg. State                                 | 72 (22%)          | 12 (11%)            | 11 (4%)           | 0 (0%)             | 5 (2%)            | 0 (0%)             | 1 (0%)            | 0 (0%)             |
| Died                                       | 60 (18%)          | 4 (4%)              | 73 (25%)          | 9 (10%)            | 78 (27%)          | 9 (12%)            | 83 (30%)          | 9 (13%)            |
| <b>DRS #2 Communication</b>                |                   |                     |                   |                    |                   |                    |                   |                    |
| Oriented                                   | 55 (17%)          | 41 (39%)            | 119 (40%)         | 57 (61%)           | 118 (41%)         | 41 (53%)           | 115 (42%)         | 48 (67%)           |
| Confused                                   | 84 (26%)          | 36 (34%)            | 80 (27%)          | 26 (28%)           | 83 (29%)          | 27 (35%)           | 68 (25%)          | 14 (19%)           |
| Inappropriate                              | 55 (17%)          | 13 (12%)            | 14 (5%)           | 1 (1%)             | 6 (2%)            | 0 (0%)             | 6 (2%)            | 1 (1%)             |
| <b>DRS #4 Feeding</b>                      |                   |                     |                   |                    |                   |                    |                   |                    |
| Complete                                   | 93 (29%)          | 61 (58%)            | 176 (59%)         | 74 (80%)           | 180 (62%)         | 64 (83%)           | 169 (62%)         | 61 (85%)           |
| Partial                                    | 18 (6%)           | 8 (8%)              | 9 (3%)            | 3 (3%)             | 9 (3%)            | 3 (4%)             | 4 (1%)            | 1 (1%)             |
| Minimal                                    | 14 (4%)           | 5 (5%)              | 11 (4%)           | 3 (3%)             | 6 (2%)            | 1 (1%)             | 6 (2%)            | 1 (1%)             |
| None                                       | 69 (21%)          | 16 (15%)            | 17 (6%)           | 4 (4%)             | 12 (4%)           | 0 (0%)             | 10 (4%)           | 0 (0%)             |
| <b>DRS #5 Toileting</b>                    |                   |                     |                   |                    |                   |                    |                   |                    |
| Complete                                   | 89 (27%)          | 58 (55%)            | 166 (56%)         | 72 (77%)           | 176 (61%)         | 63 (82%)           | 163 (60%)         | 60 (83%)           |
| Partial                                    | 10 (3%)           | 11 (10%)            | 8 (3%)            | 6 (6%)             | 4 (1%)            | 1 (1%)             | 3 (1%)            | 1 (1%)             |
| Minimal                                    | 18 (6%)           | 2 (2%)              | 15 (5%)           | 1 (1%)             | 7 (2%)            | 1 (1%)             | 6 (2%)            | 2 (3%)             |
| None                                       | 78 (24%)          | 19 (18%)            | 24 (8%)           | 5 (5%)             | 20 (7%)           | 3 (4%)             | 17 (6%)           | 0 (0%)             |
| <b>DRS #6 Grooming</b>                     |                   |                     |                   |                    |                   |                    |                   |                    |
| Complete                                   | 85 (26%)          | 57 (54%)            | 161 (54%)         | 74 (80%)           | 167 (58%)         | 61 (79%)           | 160 (59%)         | 61 (85%)           |
| Partial                                    | 8 (2%)            | 6 (6%)              | 12 (4%)           | 3 (3%)             | 12 (4%)           | 4 (5%)             | 9 (3%)            | 0 (0%)             |
| Minimal                                    | 23 (7%)           | 6 (6%)              | 16 (5%)           | 2 (2%)             | 12 (4%)           | 1 (1%)             | 7 (3%)            | 2 (3%)             |
| None                                       | 78 (24%)          | 21 (20%)            | 24 (8%)           | 5 (5%)             | 16 (6%)           | 2 (3%)             | 13 (5%)           | 0 (0%)             |
| <b>DRS #7 Level of Functioning</b>         |                   |                     |                   |                    |                   |                    |                   |                    |
| Completely independent                     | 23 (7%)           | 31 (29%)            | 83 (28%)          | 44 (47%)           | 104 (36%)         | 43 (56%)           | 103 (38%)         | 38 (53%)           |
| Independent in special environment         | 2 (1%)            | 1 (1%)              | 10 (3%)           | 4 (4%)             | 9 (3%)            | 2 (3%)             | 6 (2%)            | 1 (1%)             |

| DRS Domain Severity<br>Unweighted Analyses | 2 Weeks           |                     | 3 Months          |                    | 6 Months          |                    | 12 Months         |                    |
|--------------------------------------------|-------------------|---------------------|-------------------|--------------------|-------------------|--------------------|-------------------|--------------------|
|                                            | Severe<br>(n=326) | Moderate<br>(n=106) | Severe<br>(n=297) | Moderate<br>(n=93) | Severe<br>(n=290) | Moderate<br>(n=77) | Severe<br>(n=273) | Moderate<br>(n=72) |
| Mildly dependent                           | 29 (9%)           | 9 (8%)              | 45 (15%)          | 15 (16%)           | 30 (10%)          | 11 (14%)           | 31 (11%)          | 11 (15%)           |
| Moderately dependent                       | 16 (5%)           | 8 (8%)              | 16 (5%)           | 6 (6%)             | 14 (5%)           | 4 (5%)             | 11 (4%)           | 7 (10%)            |
| Markedly dependent                         | 14 (4%)           | 6 (6%)              | 11 (4%)           | 3 (3%)             | 15 (5%)           | 3 (4%)             | 13 (5%)           | 5 (7%)             |
| Totally dependent                          | 110 (34%)         | 35 (33%)            | 48 (16%)          | 12 (13%)           | 35 (12%)          | 5 (6%)             | 25 (9%)           | 1 (1%)             |
| <b>DRS #8 Employability</b>                |                   |                     |                   |                    |                   |                    |                   |                    |
| Not restricted                             | 27 (8%)           | 20 (19%)            | 88 (30%)          | 47 (51%)           | 95 (33%)          | 36 (47%)           | 96 (35%)          | 35 (49%)           |
| Selected jobs                              | 38 (12%)          | 24 (23%)            | 42 (14%)          | 14 (15%)           | 49 (17%)          | 16 (21%)           | 38 (14%)          | 15 (21%)           |
| Sheltered workshop                         | 14 (4%)           | 6 (6%)              | 20 (7%)           | 6 (6%)             | 14 (5%)           | 7 (9%)             | 19 (7%)           | 6 (8%)             |
| Unemployable                               | 111 (34%)         | 37 (35%)            | 57 (19%)          | 17 (18%)           | 40 (14%)          | 8 (10%)            | 33 (12%)          | 6 (8%)             |

Percentages within each domain sum to 100% after adding percent in Vegetative State and Died categories for the group at that time point (column).

**eTable 7. Cumulative frequencies and risk ratios within each Disability Rating Scale (DRS) domain for Severe TBI and Moderate TBI groups at 2 weeks, 3 months, 6 months and 12 months post-injury**

| DRS Domain Severity                 | 2 Weeks                  |                      |                                              | 3 Months                 |                      |                                              | 6 Months                 |                      |                                              | 12 Months                |                      |                                              |
|-------------------------------------|--------------------------|----------------------|----------------------------------------------|--------------------------|----------------------|----------------------------------------------|--------------------------|----------------------|----------------------------------------------|--------------------------|----------------------|----------------------------------------------|
|                                     | Severe<br>(n=326)        | Moderate<br>(n=106)  | Risk<br>Ratio                                | Severe<br>(n=297)        | Moderate<br>(n=93)   | Risk<br>Ratio                                | Severe<br>(n=290)        | Moderate<br>(n=77)   | Risk<br>Ratio                                | Severe<br>(n=273)        | Moderate<br>(n=72)   | Risk<br>Ratio                                |
| <b>Vegetative State &amp; Death</b> |                          |                      |                                              |                          |                      |                                              |                          |                      |                                              |                          |                      |                                              |
| Vegetative state or Died            | 132<br>(40%)<br>[35, 46] | 16 (15%)<br>[9, 23]  | <b>2.68</b><br><b>(1.68,</b><br><b>4.29)</b> | 84 (28%)<br>[23, 34]     | 9 (10%)<br>[5, 17]   | <b>2.92</b><br><b>(1.53,</b><br><b>5.58)</b> | 83 (29%)<br>[24, 34]     | 9 (12%)<br>[6, 20]   | <b>2.45</b><br><b>(1.29,</b><br><b>4.65)</b> | 84 (31%)<br>[25, 36]     | 9 (13%)<br>[6, 21]   | <b>2.46</b><br><b>(1.30,</b><br><b>4.65)</b> |
| Died                                | 60 (18%)<br>[14, 23]     | 4 (4%)<br>[1, 9]     | <b>4.88</b><br><b>(1.82,</b><br><b>13.1)</b> | 73 (25%)<br>[20, 30]     | 9 (10%)<br>[5, 17]   | <b>2.54</b><br><b>(1.32,</b><br><b>4.88)</b> | 78 (27%)<br>[22, 32]     | 9 (12%)<br>[6, 20]   | <b>2.30</b><br><b>(1.21,</b><br><b>4.38)</b> | 83 (30%)<br>[25, 36]     | 9 (13%)<br>[6, 21]   | <b>2.43</b><br><b>(1.29,</b><br><b>4.60)</b> |
| <b>DRS #2 Communication</b>         |                          |                      |                                              |                          |                      |                                              |                          |                      |                                              |                          |                      |                                              |
| Confused ( <i>or worse</i> )        | 271<br>(83%)<br>[79, 87] | 65 (61%)<br>[52, 70] | <b>1.36</b><br><b>(1.16,</b><br><b>1.59)</b> | 178<br>(60%)<br>[54, 65] | 36 (39%)<br>[29, 49] | <b>1.55</b><br><b>(1.18,</b><br><b>2.03)</b> | 172<br>(59%)<br>[54, 65] | 36 (47%)<br>[36, 58] | 1.27<br>(0.98,<br>1.64)                      | 158<br>(58%)<br>[52, 64] | 24 (33%)<br>[23, 45] | <b>1.74</b><br><b>(1.23,</b><br><b>2.44)</b> |
| Inappropriate ( <i>or worse</i> )   | 187<br>(57%)<br>[52, 63] | 29 (27%)<br>[19, 36] | <b>2.10</b><br><b>(1.52,</b><br><b>2.90)</b> | 98 (33%)<br>[28, 38]     | 10 (11%)<br>[6, 18]  | <b>3.07</b><br><b>(1.67,</b><br><b>5.63)</b> | 89 (31%)<br>[26, 36]     | 9 (12%)<br>[6, 20]   | <b>2.63</b><br><b>(1.39,</b><br><b>4.97)</b> | 90 (33%)<br>[28, 39]     | 10 (14%)<br>[7, 23]  | <b>2.37</b><br><b>(1.30,</b><br><b>4.32)</b> |
| <b>DRS #4 Feeding</b>               |                          |                      |                                              |                          |                      |                                              |                          |                      |                                              |                          |                      |                                              |
| Partial ( <i>or worse</i> )         | 233<br>(71%)<br>[66, 76] | 45 (42%)<br>[33, 52] | <b>1.68</b><br><b>(1.33,</b><br><b>2.12)</b> | 121<br>(41%)<br>[35, 46] | 19 (20%)<br>[13, 29] | <b>1.99</b><br><b>(1.31,</b><br><b>3.05)</b> | 110<br>(38%)<br>[32, 44] | 13 (17%)<br>[10, 26] | <b>2.25</b><br><b>(1.34,</b><br><b>3.77)</b> | 104<br>(38%)<br>[32, 44] | 11 (15%)<br>[8, 25]  | <b>2.49</b><br><b>(1.42,</b><br><b>4.39)</b> |
| Minimal ( <i>or worse</i> )         | 215<br>(66%)<br>[61, 71] | 37 (35%)<br>[26, 44] | <b>1.89</b><br><b>(1.44,</b><br><b>2.48)</b> | 112<br>(38%)<br>[32, 43] | 16 (17%)<br>[10, 26] | <b>2.19</b><br><b>(1.37,</b><br><b>3.50)</b> | 101<br>(35%)<br>[29, 40] | 10 (13%)<br>[7, 22]  | <b>2.68</b><br><b>(1.47,</b><br><b>4.88)</b> | 100<br>(37%)<br>[31, 42] | 10 (14%)<br>[7, 23]  | <b>2.64</b><br><b>(1.45,</b><br><b>4.79)</b> |
| None ( <i>or worse</i> )            | 201<br>(62%)<br>[56, 67] | 32 (30%)<br>[22, 39] | <b>2.04</b><br><b>(1.51,</b><br><b>2.76)</b> | 101<br>(34%)<br>[29, 40] | 13 (14%)<br>[8, 22]  | <b>2.43</b><br><b>(1.43,</b><br><b>4.13)</b> | 95 (33%)<br>[28, 38]     | 9 (12%)<br>[6, 20]   | <b>2.80</b><br><b>(1.48,</b><br><b>5.29)</b> | 94 (34%)<br>[29, 40]     | 9 (13%)<br>[6, 21]   | <b>2.75</b><br><b>(1.46,</b><br><b>5.19)</b> |
| <b>DRS #5 Toileting</b>             |                          |                      |                                              |                          |                      |                                              |                          |                      |                                              |                          |                      |                                              |
| Partial ( <i>or worse</i> )         | 237<br>(73%)<br>[68, 77] | 48 (45%)<br>[36, 55] | <b>1.61</b><br><b>(1.29,</b><br><b>2.00)</b> | 131<br>(44%)<br>[39, 50] | 21 (23%)<br>[15, 32] | <b>1.95</b><br><b>(1.31,</b><br><b>2.91)</b> | 114<br>(39%)<br>[34, 45] | 14 (18%)<br>[11, 28] | <b>2.16</b><br><b>(1.32,</b><br><b>3.55)</b> | 110<br>(40%)<br>[35, 46] | 12 (17%)<br>[9, 26]  | <b>2.42</b><br><b>(1.41,</b><br><b>4.13)</b> |

| DRS Domain Severity                                    | 2 Weeks                  |                      |                                              | 3 Months                 |                      |                                              | 6 Months                 |                      |                                              | 12 Months                |                      |                                              |
|--------------------------------------------------------|--------------------------|----------------------|----------------------------------------------|--------------------------|----------------------|----------------------------------------------|--------------------------|----------------------|----------------------------------------------|--------------------------|----------------------|----------------------------------------------|
|                                                        | Severe<br>(n=326)        | Moderate<br>(n=106)  | Risk<br>Ratio                                | Severe<br>(n=297)        | Moderate<br>(n=93)   | Risk<br>Ratio                                | Severe<br>(n=290)        | Moderate<br>(n=77)   | Risk<br>Ratio                                | Severe<br>(n=273)        | Moderate<br>(n=72)   | Risk<br>Ratio                                |
| Minimal ( <i>or worse</i> )                            | 227<br>(70%)<br>[64, 74] | 37 (35%)<br>[26, 44] | <b>1.99</b><br><b>(1.52,</b><br><b>2.61)</b> | 123<br>(41%)<br>[36, 47] | 15 (16%)<br>[10, 24] | <b>2.57</b><br><b>(1.58,</b><br><b>4.16)</b> | 110<br>(38%)<br>[32, 44] | 13 (17%)<br>[10, 26] | <b>2.25</b><br><b>(1.34,</b><br><b>3.77)</b> | 107<br>(39%)<br>[34, 45] | 11 (15%)<br>[8, 25]  | <b>2.57</b><br><b>(1.46,</b><br><b>4.51)</b> |
| None ( <i>or worse</i> )                               | 209<br>(64%)<br>[59, 69] | 35 (33%)<br>[25, 42] | <b>1.94</b><br><b>(1.46,</b><br><b>2.58)</b> | 108<br>(36%)<br>[31, 42] | 14 (15%)<br>[9, 23]  | <b>2.42</b><br><b>(1.46,</b><br><b>4.01)</b> | 103<br>(36%)<br>[30, 41] | 12 (16%)<br>[9, 25]  | <b>2.28</b><br><b>(1.32,</b><br><b>3.92)</b> | 101<br>(37%)<br>[31, 43] | 9 (13%)<br>[6, 21]   | <b>2.96</b><br><b>(1.58,</b><br><b>5.56)</b> |
| <b>DRS #6 Grooming</b>                                 |                          |                      |                                              |                          |                      |                                              |                          |                      |                                              |                          |                      |                                              |
| Partial ( <i>or worse</i> )                            | 241<br>(74%)<br>[69, 78] | 49 (46%)<br>[37, 56] | <b>1.60</b><br><b>(1.29,</b><br><b>1.98)</b> | 136<br>(46%)<br>[40, 51] | 19 (20%)<br>[13, 29] | <b>2.24</b><br><b>(1.47,</b><br><b>3.41)</b> | 123<br>(42%)<br>[37, 48] | 16 (21%)<br>[13, 31] | <b>2.04</b><br><b>(1.29,</b><br><b>3.22)</b> | 113<br>(41%)<br>[36, 47] | 11 (15%)<br>[8, 25]  | <b>2.71</b><br><b>(1.54,</b><br><b>4.75)</b> |
| Minimal ( <i>or worse</i> )                            | 233<br>(71%)<br>[66, 76] | 43 (41%)<br>[32, 50] | <b>1.76</b><br><b>(1.39,</b><br><b>2.24)</b> | 124<br>(42%)<br>[36, 47] | 16 (17%)<br>[10, 26] | <b>2.43</b><br><b>(1.52,</b><br><b>3.87)</b> | 111<br>(38%)<br>[33, 44] | 12 (16%)<br>[9, 25]  | <b>2.46</b><br><b>(1.43,</b><br><b>4.21)</b> | 104<br>(38%)<br>[32, 44] | 11 (15%)<br>[8, 25]  | <b>2.49</b><br><b>(1.42,</b><br><b>4.39)</b> |
| None ( <i>or worse</i> )                               | 210<br>(64%)<br>[59, 69] | 37 (35%)<br>[26, 44] | <b>1.85</b><br><b>(1.41,</b><br><b>2.42)</b> | 108<br>(36%)<br>[31, 42] | 14 (15%)<br>[9, 23]  | <b>2.42</b><br><b>(1.46,</b><br><b>4.01)</b> | 99 (34%)<br>[29, 40]     | 11 (14%)<br>[8, 23]  | <b>2.39</b><br><b>(1.35,</b><br><b>4.23)</b> | 97 (36%)<br>[30, 41]     | 9 (13%)<br>[6, 21]   | <b>2.84</b><br><b>(1.51,</b><br><b>5.35)</b> |
| <b>DRS #7 Level of Functioning</b>                     |                          |                      |                                              |                          |                      |                                              |                          |                      |                                              |                          |                      |                                              |
| Independent in special environment ( <i>or worse</i> ) | 303<br>(93%)<br>[90, 95] | 75 (71%)<br>[62, 79] | <b>1.31</b><br><b>(1.16,</b><br><b>1.49)</b> | 214<br>(72%)<br>[67, 77] | 49 (53%)<br>[43, 63] | <b>1.37</b><br><b>(1.11,</b><br><b>1.68)</b> | 186<br>(64%)<br>[59, 70] | 34 (44%)<br>[33, 55] | <b>1.45</b><br><b>(1.11,</b><br><b>1.89)</b> | 170<br>(62%)<br>[56, 68] | 34 (47%)<br>[36, 59] | <b>1.32</b><br><b>(1.02,</b><br><b>1.71)</b> |
| Mildly dependent ( <i>or worse</i> )                   | 301<br>(92%)<br>[89, 95] | 74 (70%)<br>[61, 78] | <b>1.32</b><br><b>(1.16,</b><br><b>1.50)</b> | 204<br>(69%)<br>[63, 74] | 45 (48%)<br>[38, 58] | <b>1.42</b><br><b>(1.14,</b><br><b>1.78)</b> | 177<br>(61%)<br>[55, 67] | 32 (42%)<br>[31, 53] | <b>1.47</b><br><b>(1.11,</b><br><b>1.94)</b> | 164<br>(60%)<br>[54, 66] | 33 (46%)<br>[35, 57] | <b>1.31</b><br><b>(1.00,</b><br><b>1.72)</b> |
| Moderately dependent ( <i>or worse</i> )               | 272<br>(83%)<br>[79, 87] | 65 (61%)<br>[52, 70] | <b>1.36</b><br><b>(1.16,</b><br><b>1.59)</b> | 159<br>(54%)<br>[48, 59] | 30 (32%)<br>[23, 42] | <b>1.66</b><br><b>(1.21,</b><br><b>2.27)</b> | 147<br>(51%)<br>[45, 56] | 21 (27%)<br>[18, 38] | <b>1.86</b><br><b>(1.27,</b><br><b>2.72)</b> | 133<br>(49%)<br>[43, 55] | 22 (31%)<br>[21, 42] | <b>1.59</b><br><b>(1.10,</b><br><b>2.31)</b> |
| Markedly dependent ( <i>or worse</i> )                 | 256<br>(79%)<br>[74, 83] | 57 (54%)<br>[44, 63] | <b>1.46</b><br><b>(1.21,</b><br><b>1.76)</b> | 143<br>(48%)<br>[42, 54] | 24 (26%)<br>[18, 35] | <b>1.87</b><br><b>(1.30,</b><br><b>2.69)</b> | 133<br>(46%)<br>[40, 52] | 17 (22%)<br>[14, 32] | <b>2.08</b><br><b>(1.34,</b><br><b>3.22)</b> | 122<br>(45%)<br>[39, 51] | 15 (21%)<br>[13, 31] | <b>2.15</b><br><b>(1.34,</b><br><b>3.43)</b> |
| Totally dependent ( <i>or worse</i> )                  | 242<br>(74%)<br>[69, 79] | 51 (48%)<br>[39, 58] | <b>1.54</b><br><b>(1.25,</b><br><b>1.90)</b> | 132<br>(44%)<br>[39, 50] | 21 (23%)<br>[15, 32] | <b>1.97</b><br><b>(1.32,</b><br><b>2.93)</b> | 118<br>(41%)<br>[35, 46] | 14 (18%)<br>[11, 28] | <b>2.24</b><br><b>(1.37,</b><br><b>3.67)</b> | 109<br>(40%)<br>[34, 46] | 10 (14%)<br>[7, 23]  | <b>2.87</b><br><b>(1.59,</b><br><b>5.20)</b> |
| <b>DRS #8 Employability</b>                            |                          |                      |                                              |                          |                      |                                              |                          |                      |                                              |                          |                      |                                              |

| DRS Domain Severity              | 2 Weeks                  |                      |                                              | 3 Months                 |                      |                                              | 6 Months                 |                      |                                              | 12 Months                |                      |                                              |
|----------------------------------|--------------------------|----------------------|----------------------------------------------|--------------------------|----------------------|----------------------------------------------|--------------------------|----------------------|----------------------------------------------|--------------------------|----------------------|----------------------------------------------|
|                                  | Severe<br>(n=326)        | Moderate<br>(n=106)  | Risk<br>Ratio                                | Severe<br>(n=297)        | Moderate<br>(n=93)   | Risk<br>Ratio                                | Severe<br>(n=290)        | Moderate<br>(n=77)   | Risk<br>Ratio                                | Severe<br>(n=273)        | Moderate<br>(n=72)   | Risk<br>Ratio                                |
| Selected jobs<br>(or worse)      | 295<br>(92%)<br>[88, 94] | 83 (81%)<br>[72, 87] | <b>1.14</b><br><b>(1.03,</b><br><b>1.26)</b> | 203<br>(70%)<br>[64, 75] | 46 (49%)<br>[39, 60] | <b>1.41</b><br><b>(1.13,</b><br><b>1.76)</b> | 186<br>(66%)<br>[61, 72] | 40 (53%)<br>[41, 64] | <b>1.26</b><br><b>(1.00,</b><br><b>1.58)</b> | 174<br>(64%)<br>[59, 70] | 36 (51%)<br>[39, 62] | <b>1.27</b><br><b>(0.99,</b><br><b>1.63)</b> |
| Sheltered workshop<br>(or worse) | 257<br>(80%)<br>[75, 84] | 59 (57%)<br>[48, 67] | <b>1.39</b><br><b>(1.17,</b><br><b>1.66)</b> | 161<br>(55%)<br>[50, 61] | 32 (34%)<br>[25, 44] | <b>1.61</b><br><b>(1.19,</b><br><b>2.17)</b> | 137<br>(49%)<br>[43, 55] | 24 (32%)<br>[22, 43] | <b>1.54</b><br><b>(1.09,</b><br><b>2.20)</b> | 136<br>(50%)<br>[44, 56] | 21 (30%)<br>[20, 41] | <b>1.70</b><br><b>(1.17,</b><br><b>2.49)</b> |
| Unemployable<br>(or worse)       | 243<br>(75%)<br>[71, 80] | 53 (51%)<br>[42, 61] | <b>1.47</b><br><b>(1.20,</b><br><b>1.79)</b> | 141<br>(48%)<br>[43, 54] | 26 (28%)<br>[20, 38] | <b>1.73</b><br><b>(1.22,</b><br><b>2.45)</b> | 123<br>(44%)<br>[38, 50] | 17 (22%)<br>[14, 33] | <b>1.96</b><br><b>(1.26,</b><br><b>3.04)</b> | 117<br>(43%)<br>[38, 49] | 15 (21%)<br>[13, 32] | <b>2.05</b><br><b>(1.28,</b><br><b>3.28)</b> |

"Severe" and "Moderate" columns report the n and percent of cases with a severity at or worse than the category label. Risk ratios were calculated as the percent with disability of the indicated level or worse in the Severe TBI group divided by the corresponding percent in the Moderate TBI group. For example, for minimal feeding, the percent includes those with minimal feeding, no feeding, vegetative state, or dead. The 95% confidence intervals on risk ratios were estimated based on the near-normal distribution of the log of the risk ratio.<sup>36</sup> Statistical significance determined by Fisher's exact tests. Bold cells indicate statistical significance (p<.05) following post-hoc adjustment for all 108 multiple comparisons using a false discovery rate of 5%.<sup>37</sup>

**eTable 8. Group differences on clinical outcome assessment measures at 12 months post-injury**

| All subjects with at least one neuropsych score                                                                    | Severe TBI<br>n=108  | Moderate TBI<br>n=36 | Severe TBI vs.<br>Moderate TBI        |
|--------------------------------------------------------------------------------------------------------------------|----------------------|----------------------|---------------------------------------|
| <b>Continuous Measures</b>                                                                                         | <b>Mean (95% CI)</b> |                      | <b>Cohen's d Effect Size (95% CI)</b> |
| <b>Memory</b>                                                                                                      |                      |                      |                                       |
| RAVLT Immediate Memory <sup>1</sup>                                                                                | 43.6<br>(41.3, 45.8) | 44.3<br>(40.3, 48.2) | -0.07<br>(-0.44, 0.31)                |
| RAVLT Delayed Recall <sup>1</sup>                                                                                  | 8.2<br>(7.5, 9.0)    | 8.0<br>(6.8, 9.2)    | 0.03<br>(-0.35, 0.41)                 |
| <b>Processing Speed (PS)</b>                                                                                       |                      |                      |                                       |
| WAIS-IV PS Index <sup>1</sup>                                                                                      | 93<br>(90, 97)       | 95<br>(89, 101)      | -0.12<br>(-0.51, 0.26)                |
| <b>Executive Functioning</b>                                                                                       |                      |                      |                                       |
| Trails A Time <sup>1</sup>                                                                                         | 34.3<br>(30.5, 38.2) | 30.8<br>(25.0, 36.5) | 0.26<br>(-0.12, 0.64)                 |
| Trails B Time <sup>1</sup>                                                                                         | 95<br>(81, 109)      | 84<br>(66, 102)      | 0.08<br>(-0.30, 0.47)                 |
| All subjects with at least one neuropsych score, plus those who are missing due to death or TBI-related impairment | Severe TBI<br>n=227  | Moderate TBI<br>n=57 | Severe TBI vs.<br>Moderate TBI        |
| <b>Continuous Measures</b>                                                                                         | <b>Mean (95% CI)</b> |                      | <b>Cohen's d Effect Size (95% CI)</b> |
| <b>Memory</b>                                                                                                      |                      |                      |                                       |
| RAVLT Immediate Memory <sup>1</sup>                                                                                | 19.6<br>(16.5, 22.8) | 27.4<br>(21.1, 33.8) | -0.46<br>(-0.75, -0.17)               |
| RAVLT Delayed Recall <sup>1</sup>                                                                                  | 3.0<br>(2.2, 3.7)    | 4.5<br>(3.1, 5.9)    | -0.43<br>(-0.72, -0.14)               |
| <b>Processing Speed (PS)</b>                                                                                       |                      |                      |                                       |
| WAIS-IV PS Index <sup>1</sup>                                                                                      | 69<br>(66, 73)       | 78<br>(71, 85)       | -0.47<br>(-0.77, -0.18)               |
| <b>Executive Functioning</b>                                                                                       |                      |                      |                                       |
| Trails A Time <sup>1</sup>                                                                                         | 70.1<br>(65.3, 74.9) | 57.3<br>(47.4, 67.2) | 0.53<br>(0.24, 0.83)                  |
| Trails B Time <sup>1</sup>                                                                                         | 206<br>(191, 221)    | 166<br>(135, 196)    | 0.48<br>(0.19, 0.78)                  |
| All subjects with at least one self-report score                                                                   | Severe TBI<br>n=147  | Moderate TBI<br>n=49 | Severe TBI vs.<br>Moderate TBI        |
| <b>Patient Reported Outcomes</b>                                                                                   |                      |                      |                                       |
| Psychological Distress (BSI-18 GSI) T <sup>2</sup>                                                                 | 49.7<br>(47.9, 51.4) | 49.9<br>(46.5, 53.2) | -0.02<br>(-0.34, 0.31)                |
| Life Satisfaction (SWLS) <sup>2</sup>                                                                              | 23.0<br>(21.6, 24.3) | 23.3<br>(21.2, 25.4) | -0.04<br>(-0.37, 0.29)                |
| TBI Symptoms (RPQ Score) <sup>2</sup>                                                                              | 14.4<br>(12.3, 16.5) | 13.6<br>(10.0, 17.2) | 0.06<br>(-0.26, 0.39)                 |



| Rivermead Symptoms (value≥2)           | N (%) Endorsed<br>(95% CI) |                      | Risk Ratio<br>(95% CI) |
|----------------------------------------|----------------------------|----------------------|------------------------|
|                                        |                            |                      |                        |
| Headache <sup>3</sup>                  | 42 (29%)<br>[22, 36]       | 12 (24%)<br>[14, 38] | 1.17<br>(0.68, 2.04)   |
| Dizziness <sup>3</sup>                 | 41 (28%)<br>[21, 36]       | 14 (29%)<br>[17, 42] | 0.98<br>(0.59, 1.64)   |
| Nausea <sup>3</sup>                    | 10 (7%)<br>[3, 12]         | 2 (4%)<br>[1, 12]    | 1.68<br>(0.38, 7.40)   |
| Noise sensitivity <sup>3</sup>         | 40 (27%)<br>[21, 35]       | 16 (33%)<br>[21, 46] | 0.84<br>(0.52, 1.36)   |
| Sleep disturbances <sup>3</sup>        | 49 (34%)<br>[26, 41]       | 16 (33%)<br>[21, 46] | 1.03<br>(0.65, 1.63)   |
| Fatigue <sup>3</sup>                   | 67 (46%)<br>[38, 54]       | 24 (49%)<br>[35, 63] | 0.94<br>(0.67, 1.31)   |
| Irritability/anger <sup>3</sup>        | 69 (47%)<br>[39, 55]       | 22 (45%)<br>[31, 59] | 1.05<br>(0.74, 1.50)   |
| Depression/tearfulness <sup>3</sup>    | 50 (34%)<br>[27, 42]       | 18 (37%)<br>[24, 51] | 0.93<br>(0.61, 1.43)   |
| Frustration/impatience <sup>3</sup>    | 70 (48%)<br>[40, 56]       | 22 (45%)<br>[31, 59] | 1.07<br>(0.75, 1.52)   |
| Forgetfulness/poor memory <sup>3</sup> | 97 (66%)<br>[59, 74]       | 26 (53%)<br>[39, 67] | 1.25<br>(0.94, 1.67)   |
| Poor concentration <sup>3</sup>        | 70 (48%)<br>[40, 56]       | 24 (49%)<br>[35, 63] | 0.98<br>(0.70, 1.36)   |
| Taking longer to think <sup>3</sup>    | 79 (54%)<br>[46, 62]       | 25 (51%)<br>[37, 65] | 1.06<br>(0.78, 1.45)   |
| Blurred vision <sup>3</sup>            | 32 (22%)<br>[16, 29]       | 12 (24%)<br>[14, 38] | 0.89<br>(0.50, 1.60)   |
| Light sensitivity <sup>3</sup>         | 24 (16%)<br>[11, 23]       | 11 (22%)<br>[12, 35] | 0.73<br>(0.39, 1.38)   |
| Double vision <sup>3</sup>             | 17 (12%)<br>[7, 18]        | 3 (6%)<br>[2, 15]    | 1.90<br>(0.58, 6.21)   |
| Restlessness <sup>3</sup>              | 38 (26%)<br>[19, 34]       | 13 (27%)<br>[16, 40] | 0.98<br>(0.57, 1.68)   |

Abbreviations: RAVLT, Rey Auditory Verbal Learning Test; WAIS-IV, Wechsler Adult Intelligence Scale, Fourth Edition; PS Index, Processing Speed Index (normative M=100, SD=15); BSI-18, Brief Symptom Inventory, 18 item version; GSI T, Global Severity Index T score (normative M=50, SD=10); SWLS, Satisfaction with Life Scale; RPQ, Rivermead Post Concussion Symptoms Questionnaire.

<sup>1</sup>Differences in performance on neuropsychological measures were analyzed after adjusting for age, sex, and education using linear regression on ranked data. Cohen's d effect sizes were calculated from the regression output as the unstandardized coefficient divided by the root mean square error (B/RMSE). Statistical significance was interpreted in the context of multiple comparisons.<sup>37</sup> These measures were evaluated both with and without participants who could not be assessed due to death or impairment due to TBI. These latter cases are represented in the analysis by imputing a score 2 points and 1 point, respectively, worse than the worst observed score. Thus, where included, deaths were given the worst rank and those too impaired to take the tests were given ranks just above the deaths.

<sup>2</sup>Self-report measures analyzed by linear regression.

<sup>3</sup>Differences in individual symptom endorsement were characterized using risk ratios and assessed for significance using Fisher's exact tests with p-values interpreted accounting for multiple comparisons.<sup>37</sup>

**Statistical significance.** All p-values are 2-tailed. No comparisons were statistically significant (p<.05) using post-hoc adjustment for all 29 multiple comparisons per Benjamini-Hochberg (1995) using a false discovery rate of 5%.

**Missingness.** Self-report measures were available for 40% (n=196) of cases at 12 months, with 29% (n=140) dead or too impaired to complete the measures, and 31% (n=148) lost to follow-up. Neuropsychological test scores were available for 30% (n=144) of the participants at 12 months with 29% (n=140) dead or too impaired to complete the measures, 11% (n=52) assessed by telephone, and 31% (n=148) lost to follow-up. To determine if any bias caused by missing outcomes impacted the findings, separate propensity models were constructed at each time point for the presence/absence of neuropsychological (with and without subjects who either died or were too impaired to be tested) and Rivermead outcomes. See the Statistical Analysis section for details on the propensity models. These sensitivity analyses showed that the missing outcomes impacted the results to a negligible degree, thus only the unweighted analyses are reported.

**Power.** The study had at least 80% power to detect an effect size of .41 between those with moderate and severe TBI on neuropsychological measures when those who died and those who were too impaired to undergo assessment were included. The study had at least 80% power to detect an effect size of .55 when only those who completed the test battery were included), and an effect size of .42 on self-report measures.

**eFigure. STROBE diagram of participant enrollment and follow-up for Moderate TBI (GCS 9-12) and Severe TBI (GCS 3-8) groups**

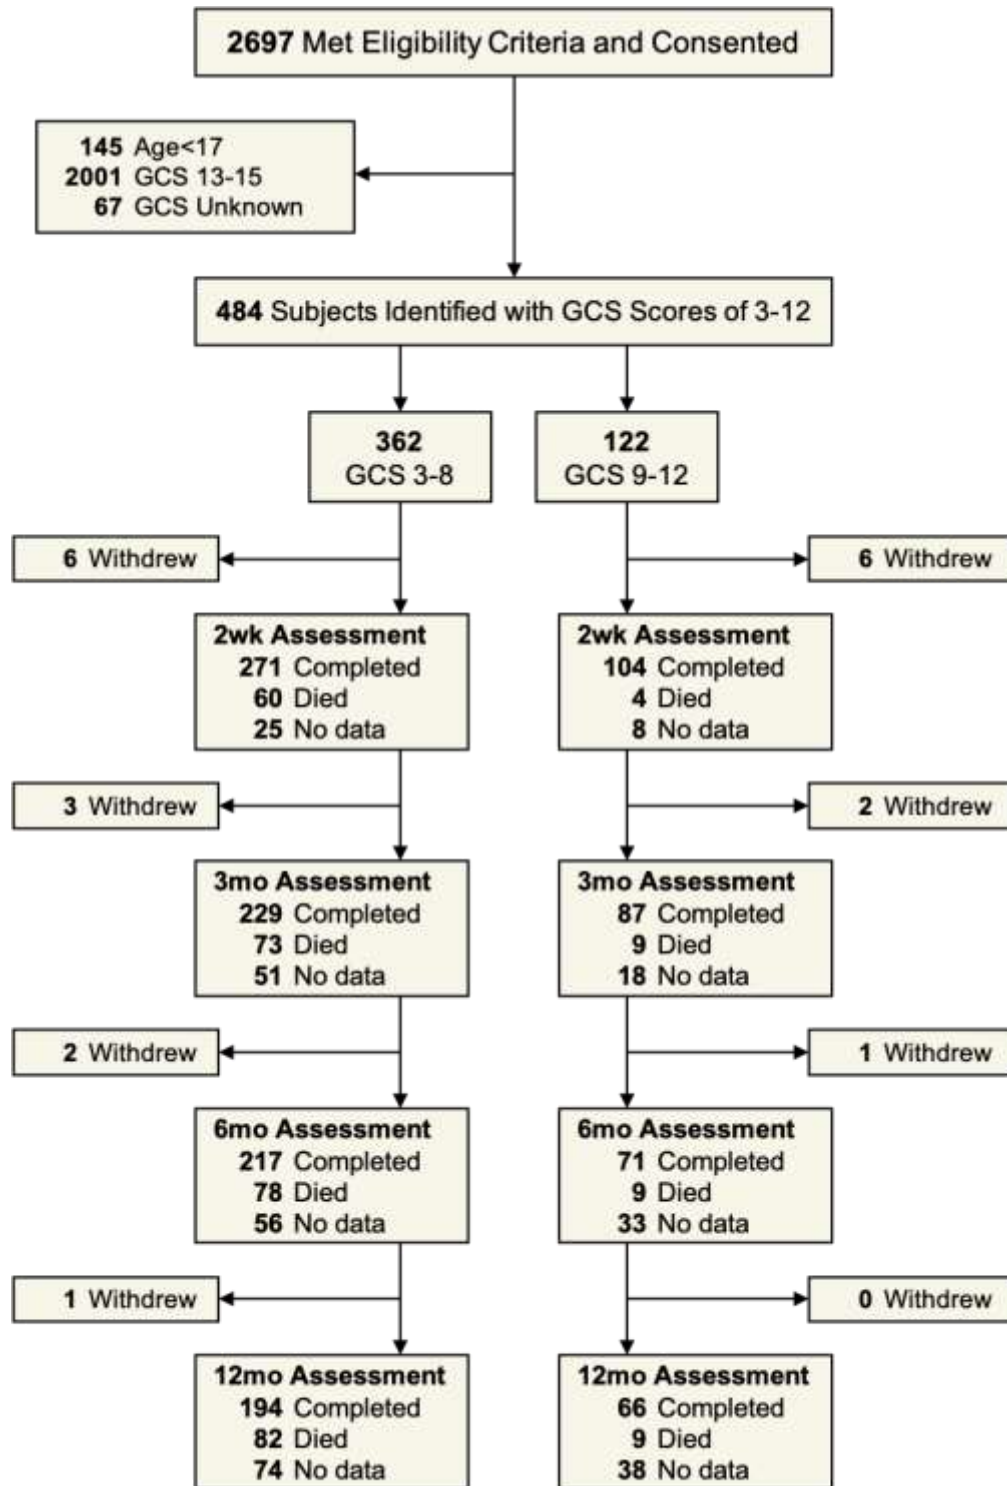

"Completed" refers to a follow-up visit with at least one completed functional outcome measure (GOSE or DRS).
